# Supplementary material for: Current, steady-state and historical weathering rates of base cations at two forest sites in northern and southern Sweden: A comparison of three methods
Source: Copernicus journal article supplement (doi:10.5194/bg-2019-47), 2019-02-05
Supplement: Supplementary file 1 [file bg-2019-47-supplement.pdf]

Figure S1

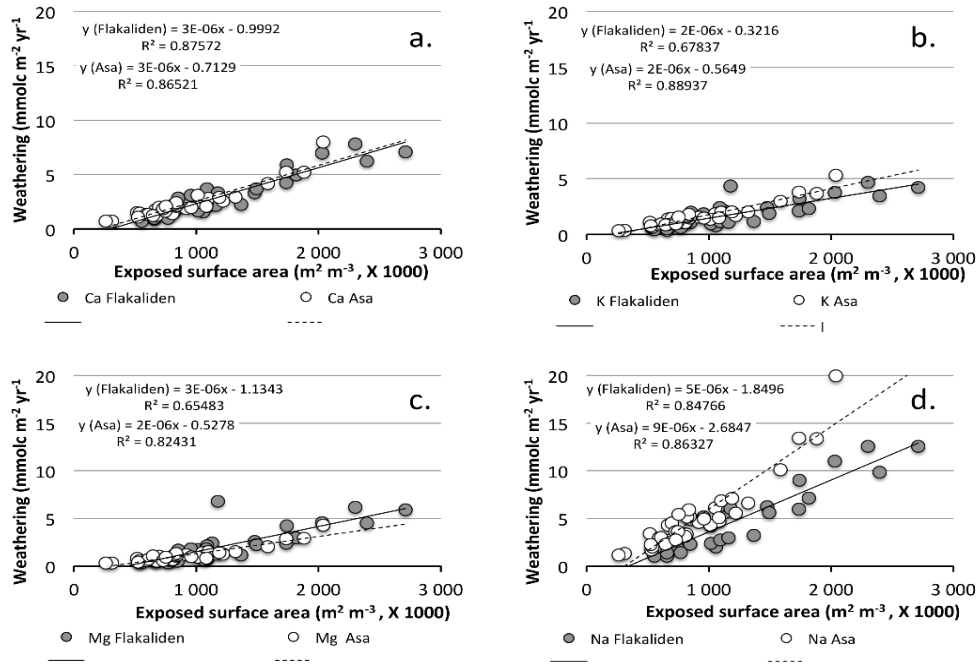

Figure S2

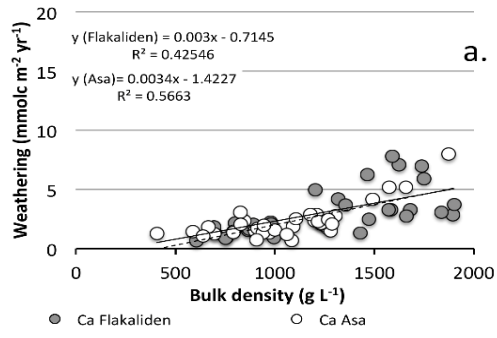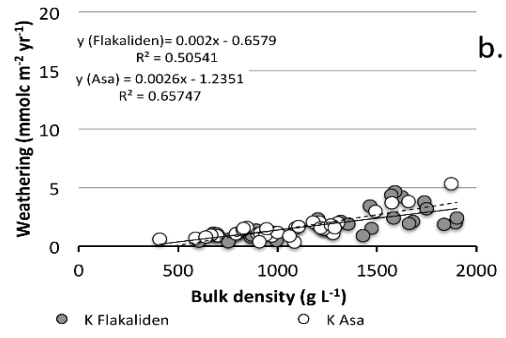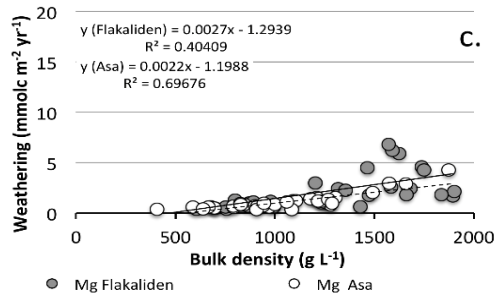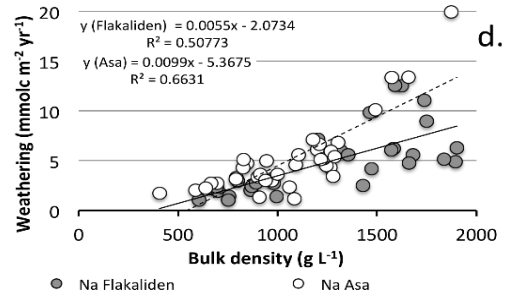

Figure S3

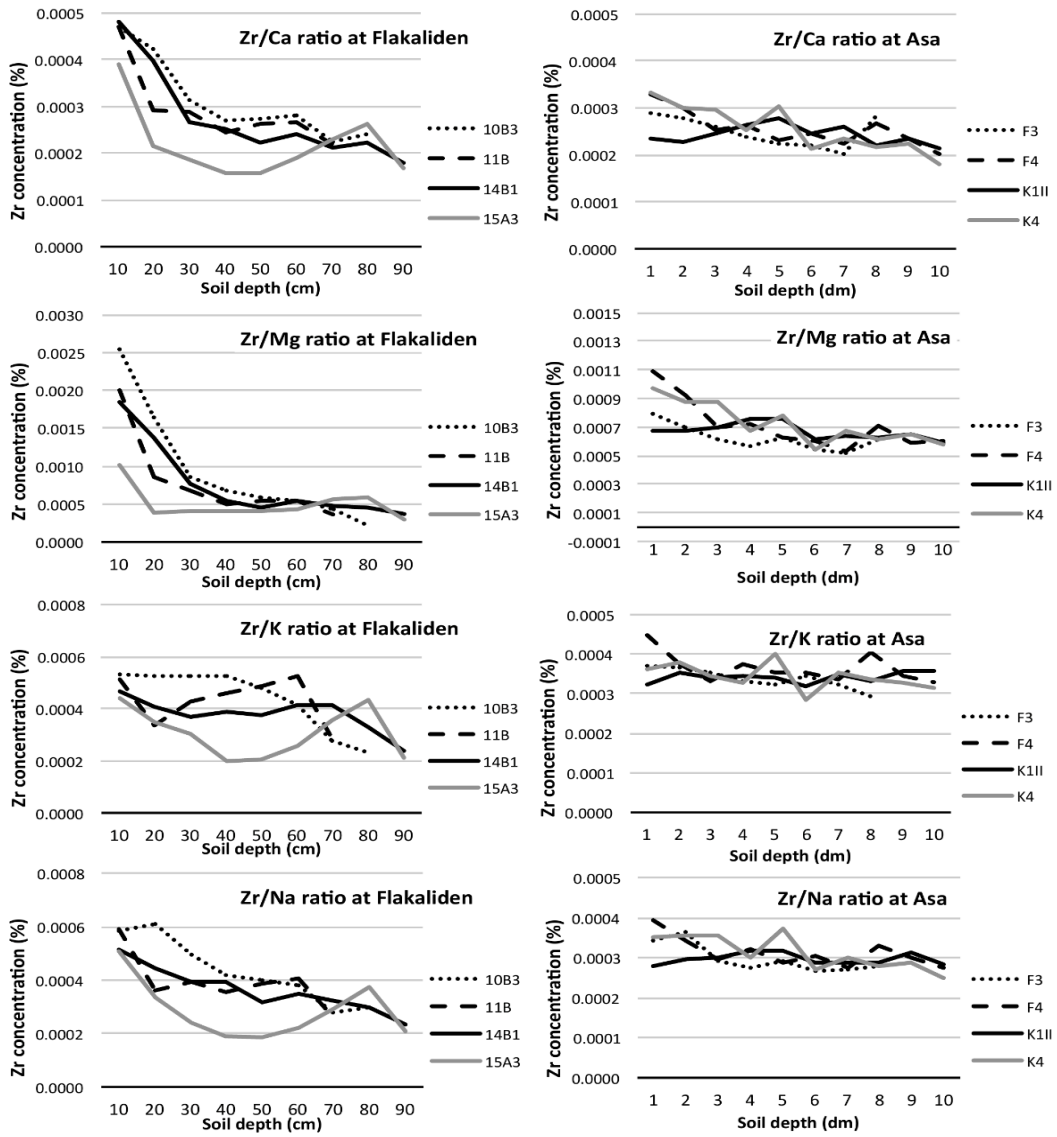

**Table S1:** Sensitivity analysis of PROFILE at Flakaliden based on three different scenarios compared to original results as used in this study. (i.e. Homogeneous soil (i.e. Homogeneous soil (soil physics and mineralogy), Homogeneous Soil physical properties (soil bulk density and specific exposed mineral surface area), Homogeneous mineralogy) compared to original results as used in this study.

| Soil profile | Soil depth | Type                                 | Ca   | Mg   | K    | Na   |
|--------------|------------|--------------------------------------|------|------|------|------|
| 11B          | 0-10       | Original results                     | 1,7  | 0,6  | 1,1  | 2,1  |
| 11B          | 10-20      | Original results                     | 1,6  | 0,7  | 0,8  | 2,0  |
| 11B          | 20-30      | Original results                     | 2,2  | 1,1  | 1,2  | 3,2  |
| 11B          | 30-40      | Original results                     | 4,2  | 2,4  | 2,1  | 6,0  |
| 11B          | 40-50      | Original results                     | 6,3  | 4,5  | 3,5  | 9,8  |
| 11B          | 50-60      | Original results                     | 7,1  | 5,9  | 4,2  | 12,5 |
| 11B          | 60-70      | Original results                     | 3,3  | 2,6  | 2,4  | 6,2  |
| 11B          | 0-50cm     | Original results                     | 16,0 | 9,4  | 8,6  | 23,1 |
| 11B          | 0-10       | Homogeneous soil                     | 6,0  | 3,5  | 3,2  | 7,3  |
| 11B          | 10-20      | Homogeneous soil                     | 3,4  | 2,1  | 1,8  | 4,7  |
| 11B          | 20-30      | Homogeneous soil                     | 3,2  | 1,9  | 1,9  | 5,0  |
| 11B          | 30-40      | Homogeneous soil                     | 3,1  | 1,9  | 1,9  | 5,1  |
| 11B          | 40-50      | Homogeneous soil                     | 3,0  | 1,9  | 1,9  | 5,0  |
| 11B          | 50-60      | Homogeneous soil                     | 3,0  | 1,9  | 1,9  | 5,0  |
| 11B          | 60-70      | Homogeneous soil                     | 3,0  | 1,9  | 1,9  | 5,0  |
| 11B          | 0-50cm     | Homogeneous soil                     | 18,7 | 11,3 | 10,7 | 27,2 |
| 11B          | 0-10       | Homogeneous Soil physical properties | 4,9  | 1,9  | 3,3  | 6,4  |
| 11B          | 10-20      | Homogeneous Soil physical properties | 3,1  | 1,4  | 1,7  | 4,1  |
| 11B          | 20-30      | Homogeneous Soil physical properties | 3,2  | 1,6  | 1,8  | 4,9  |
| 11B          | 30-40      | Homogeneous Soil physical properties | 3,6  | 2,0  | 1,8  | 5,2  |
| 11B          | 40-50      | Homogeneous Soil physical properties | 3,5  | 2,5  | 1,9  | 5,5  |
| 11B          | 50-60      | Homogeneous Soil physical properties | 3,1  | 2,6  | 1,9  | 5,5  |
| 11B          | 60-70      | Homogeneous Soil physical properties | 2,8  | 2,2  | 2,0  | 5,2  |
| 11B          | 0-50cm     | Homogeneous Soil physical properties | 18,2 | 9,5  | 10,5 | 26,1 |
| 11B          | 0-10       | Homogeneous mineralogy               | 2,1  | 1,2  | 1,0  | 2,4  |
| 11B          | 10-20      | Homogeneous mineralogy               | 1,7  | 1,0  | 0,9  | 2,3  |
| 11B          | 20-30      | Homogeneous mineralogy               | 2,2  | 1,4  | 1,3  | 3,3  |
| 11B          | 30-40      | Homogeneous mineralogy               | 3,7  | 2,2  | 2,3  | 5,9  |
| 11B          | 40-50      | Homogeneous mineralogy               | 5,5  | 3,3  | 3,4  | 9,0  |
| 11B          | 50-60      | Homogeneous mineralogy               | 6,9  | 4,3  | 4,2  | 11,5 |
| 11B          | 60-70      | Homogeneous mineralogy               | 3,6  | 2,2  | 2,2  | 6,0  |
| 11B          | 0-50cm     | Homogeneous mineralogy               | 15,2 | 9,2  | 8,8  | 22,9 |
| 14B          | 0-10       | Original results                     | 1,3  | 0,4  | 0,9  | 1,9  |
| 14B          | 10-20      | Original results                     | 0,9  | 0,4  | 0,6  | 1,4  |
| 14B          | 20-30      | Original results                     | 0,7  | 0,4  | 0,4  | 1,0  |
| 14B          | 30-40      | Original results                     | 1,7  | 1,0  | 0,9  | 2,4  |
| 14B          | 40-50      | Original results                     | 3,7  | 2,2  | 1,9  | 5,6  |
| 14B          | 50-60      | Original results                     | 7,0  | 4,6  | 3,8  | 11,0 |
| 14B          | 60-70      | Original results                     | 5,9  | 4,3  | 3,2  | 9,0  |
| 14B          | 70-80      | Original results                     | 2,5  | 1,7  | 1,5  | 4,2  |
| 14B          | 80-90      | Original results                     | 3,3  | 2,4  | 2,1  | 5,6  |
| 14B          | 0-50cm     | Original results                     | 8,2  | 4,5  | 4,8  | 12,4 |
| 14B          | 0-10       | Homogeneous soil                     | 4,3  | 2,5  | 2,3  | 5,2  |
| 14B          | 10-20      | Homogeneous soil                     | 2,4  | 1,4  | 1,3  | 3,3  |
| 14B          | 20-30      | Homogeneous soil                     | 2,3  | 1,4  | 1,4  | 3,6  |
| 14B          | 30-40      | Homogeneous soil                     | 2,3  | 1,3  | 1,4  | 3,7  |
| 14B          | 40-50      | Homogeneous soil                     | 2,2  | 1,3  | 1,4  | 3,7  |
| 14B          | 50-60      | Homogeneous soil                     | 2,2  | 1,3  | 1,4  | 3,7  |
| 14B          | 60-70      | Homogeneous soil                     | 2,2  | 1,3  | 1,4  | 3,7  |
| 14B          | 70-80      | Homogeneous soil                     | 2,2  | 1,3  | 1,4  | 3,7  |
| 14B          | 80-90      | Homogeneous soil                     | 2,2  | 1,3  | 1,4  | 3,7  |
| 14B          | 0-50cm     | Homogeneous soil                     | 13,4 | 8,0  | 7,7  | 19,4 |
| 14B          | 0-10       | Homogeneous Soil physical properties | 3,0  | 1,0  | 2,1  | 4,5  |
| 14B          | 10-20      | Homogeneous Soil physical properties | 1,9  | 0,8  | 1,3  | 2,9  |
| 14B          | 20-30      | Homogeneous Soil physical properties | 2,1  | 1,1  | 1,3  | 3,2  |
| 14B          | 30-40      | Homogeneous Soil physical properties | 2,3  | 1,4  | 1,3  | 3,5  |
| 14B          | 40-50      | Homogeneous Soil physical properties | 2,5  | 1,5  | 1,3  | 3,9  |
| 14B          | 50-60      | Homogeneous Soil physical properties | 2,6  | 1,7  | 1,4  | 4,0  |
| 14B          | 60-70      | Homogeneous Soil physical properties | 2,6  | 1,8  | 1,4  | 3,8  |
| 14B          | 70-80      | Homogeneous Soil physical properties | 2,4  | 1,7  | 1,5  | 4,0  |
| 14B          | 80-90      | Homogeneous Soil physical properties | 2,4  | 1,7  | 1,5  | 4,0  |
| 14B          | 0-50cm     | Homogeneous Soil physical properties | 11,7 | 5,8  | 7,3  | 18,1 |
| 14B          | 0-10       | Homogeneous mineralogy               | 1,8  | 1,1  | 0,9  | 2,2  |
| 14B          | 10-20      | Homogeneous mineralogy               | 1,2  | 0,7  | 0,6  | 1,6  |
| 14B          | 20-30      | Homogeneous mineralogy               | 0,7  | 0,5  | 0,4  | 1,1  |
| 14B          | 30-40      | Homogeneous mineralogy               | 1,7  | 1,0  | 1,0  | 2,6  |
| 14B          | 40-50      | Homogeneous mineralogy               | 3,3  | 2,0  | 2,0  | 5,3  |
| 14B          | 50-60      | Homogeneous mineralogy               | 6,1  | 3,7  | 3,8  | 10,1 |
| 14B          | 60-70      | Homogeneous mineralogy               | 5,2  | 3,2  | 3,2  | 8,7  |
| 14B          | 70-80      | Homogeneous mineralogy               | 2,3  | 1,4  | 1,4  | 3,9  |
| 14B          | 80-90      | Homogeneous mineralogy               | 3,1  | 1,9  | 1,9  | 5,2  |
| 14B          | 0-50cm     | Homogeneous mineralogy               | 8,7  | 5,2  | 5,0  | 12,8 |
| 15A          | 0-10       | Original results                     | 2,1  | 1,1  | 1,4  | 2,7  |
| 15A          | 10-20      | Original results                     | 0,9  | 0,6  | 0,4  | 1,0  |
| 15A          | 20-30      | Original results                     | 0,9  | 0,6  | 0,5  | 1,4  |
| 15A          | 30-40      | Original results                     | 1,3  | 0,6  | 0,9  | 2,5  |
| 15A          | 40-50      | Original results                     | 2,8  | 1,7  | 2,0  | 4,9  |
| 15A          | 50-60      | Original results                     | 3,7  | 2,1  | 2,4  | 6,3  |
| 15A          | 60-70      | Original results                     | 3,1  | 1,8  | 1,9  | 5,2  |
| 15A          | 70-80      | Original results                     | 2,7  | 1,8  | 1,9  | 4,8  |
| 15A          | 0-50cm     | Original results                     | 8,1  | 4,6  | 5,1  | 12,5 |
| 15A          | 0-10       | Homogeneous soil                     | 3,6  | 2,2  | 2,0  | 4,7  |
| 15A          | 10-20      | Homogeneous soil                     | 1,7  | 1,0  | 1,0  | 2,5  |
| 15A          | 20-30      | Homogeneous soil                     | 1,6  | 1,0  | 1,0  | 2,6  |
| 15A          | 30-40      | Homogeneous soil                     | 1,7  | 1,0  | 1,1  | 2,9  |
| 15A          | 40-50      | Homogeneous soil                     | 1,7  | 1,0  | 1,1  | 2,9  |
| 15A          | 50-60      | Homogeneous soil                     | 1,7  | 1,0  | 1,1  | 2,9  |
| 15A          | 60-70      | Homogeneous soil                     | 1,7  | 1,0  | 1,1  | 2,9  |
| 15A          | 70-80      | Homogeneous soil                     | 1,7  | 1,0  | 1,1  | 2,9  |
| 15A          | 0-50cm     | Homogeneous soil                     | 10,4 | 6,2  | 6,2  | 15,5 |
| 15A          | 0-10       | Homogeneous Soil physical properties | 3,1  | 1,7  | 2,0  | 4,1  |
| 15A          | 10-20      | Homogeneous Soil physical properties | 1,8  | 1,2  | 0,8  | 2,1  |
| 15A          | 20-30      | Homogeneous Soil physical properties | 1,7  | 1,1  | 0,9  | 2,5  |
| 15A          | 30-40      | Homogeneous Soil physical properties | 1,7  | 0,8  | 1,2  | 3,3  |
| 15A          | 40-50      | Homogeneous Soil physical properties | 1,7  | 1,0  | 1,2  | 3,0  |
| 15A          | 50-60      | Homogeneous Soil physical properties | 1,8  | 1,0  | 1,1  | 3,0  |
| 15A          | 60-70      | Homogeneous Soil physical properties | 1,8  | 1,1  | 1,1  | 3,0  |
| 15A          | 70-80      | Homogeneous Soil physical properties | 1,8  | 1,2  | 1,2  | 3,0  |
| 15A          | 0-50cm     | Homogeneous Soil physical properties | 9,9  | 5,7  | 6,1  | 15,0 |
| 15A          | 0-10       | Homogeneous mineralogy               | 2,4  | 1,5  | 1,3  | 3,1  |
| 15A          | 10-20      | Homogeneous mineralogy               | 0,8  | 0,5  | 0,5  | 1,2  |
| 15A          | 20-30      | Homogeneous mineralogy               | 0,9  | 0,6  | 0,6  | 1,5  |
| 15A          | 30-40      | Homogeneous mineralogy               | 1,4  | 0,8  | 0,8  | 2,2  |
| 15A          | 40-50      | Homogeneous mineralogy               | 2,8  | 1,7  | 1,8  | 4,6  |
| 15A          | 50-60      | Homogeneous mineralogy               | 3,6  | 2,1  | 2,4  | 6,1  |
| 15A          | 60-70      | Homogeneous mineralogy               | 2,9  | 1,7  | 1,9  | 4,9  |
| 15A          | 70-80      | Homogeneous mineralogy               | 2,7  | 1,6  | 1,7  | 4,6  |
| 15A          | 0-50cm     | Homogeneous mineralogy               | 8,4  | 5,0  | 5,0  | 12,6 |
| 10B          | 0-10       | Original results                     | 1,8  | 0,5  | 1,1  | 2,3  |
| 10B          | 10-20      | Original results                     | 2,1  | 0,8  | 1,1  | 2,7  |
| 10B          | 20-30      | Original results                     | 2,2  | 1,3  | 1,1  | 3,0  |
| 10B          | 30-40      | Original results                     | 5,0  | 3,0  | 2,3  | 7,2  |
| 10B          | 50-60      | Original results                     | 7,8  | 6,2  | 4,7  | 12,6 |
| 10B          | 60-70      | Original results                     | 3,3  | 6,8  | 4,3  | 6,1  |
| 10B          | 70-80      | Original results                     | 9,1  | 21,5 | 14,1 | 20,0 |
| 10B          | 0-40cm     | Original results                     | 11,1 | 5,5  | 5,6  | 15,2 |
| 10B          | 0-10       | Homogeneous soil                     | 5,4  | 4,7  | 3,7  | 6,8  |
| 10B          | 10-20      | Homogeneous soil                     | 3,8  | 3,6  | 2,8  | 5,6  |
| 10B          | 20-30      | Homogeneous soil                     | 3,5  | 3,4  | 2,8  | 5,8  |
| 10B          | 30-40      | Homogeneous soil                     | 3,4  | 3,2  | 2,7  | 5,7  |
| 10B          | 50-60      | Homogeneous soil                     | 3,3  | 3,2  | 2,6  | 5,7  |
| 10B          | 60-70      | Homogeneous soil                     | 3,3  | 3,2  | 2,6  | 5,7  |
| 10B          | 0-40cm     | Homogeneous soil                     | 3,3  | 3,2  | 2,6  | 5,6  |
| 10B          | 0-10       | Homogeneous Soil physical properties | 16,1 | 14,9 | 12,0 | 23,9 |
| 10B          | 10-20      | Homogeneous Soil physical properties | 4,7  | 1,3  | 2,8  | 6,1  |
| 10B          | 20-30      | Homogeneous Soil physical properties | 3,6  | 1,3  | 2,1  | 4,9  |
| 10B          | 30-40      | Homogeneous Soil physical properties | 3,6  | 2,2  | 2,1  | 5,6  |
| 10B          | 40-50      | Homogeneous Soil physical properties | 4,2  | 2,5  | 2,0  | 6,2  |
| 10B          | 50-60      | Homogeneous Soil physical properties | 4,0  | 3,1  | 2,4  | 6,4  |
| 10B          | 60-70      | Homogeneous Soil physical properties | 3,3  | 6,8  | 4,4  | 6,1  |
| 10B          | 70-80      | Homogeneous Soil physical properties | 2,5  | 5,7  | 3,8  | 5,4  |
| 10B          | 0-40cm     | Homogeneous Soil physical properties | 16,3 | 7,4  | 8,9  | 22,7 |
| 10B          | 0-10       | Homogeneous mineralogy               | 2,1  | 1,8  | 1,4  | 2,5  |
| 10B          | 10-20      | Homogeneous mineralogy               | 2,2  | 2,1  | 1,5  | 3,0  |
| 10B          | 20-30      | Homogeneous mineralogy               | 2,0  | 1,9  | 1,5  | 3,1  |
| 10B          | 30-40      | Homogeneous mineralogy               | 4,0  | 3,7  | 3,2  | 6,7  |
| 10B          | 50-60      | Homogeneous mineralogy               | 6,7  | 6,3  | 5,3  | 11,3 |
| 10B          | 60-70      | Homogeneous mineralogy               | 3,3  | 3,2  | 2,6  | 5,6  |
| 10B          | 70-80      | Homogeneous mineralogy               | 12,1 | 11,8 | 9,7  | 21,0 |
| 10B          | 0-40cm     | Homogeneous mineralogy               | 10,3 | 9,5  | 7,6  | 15,4 |

**Table S2:** Sensitivity analysis of PROFILE at Aaa based on three different scenarios compared to original results as used in this study. (i.e. Homogeneous soil (soil physics and mineralogy), Homogeneous Soil physical properties (soil bulk density and specific exposed mineral surface area), Homogeneous mineralogy) compared to original results as used in this study.

| Soil profile | Soil depth | Type                                 | Ca   | Mg  | K    | Na   |
|--------------|------------|--------------------------------------|------|-----|------|------|
| K4           | 0-10       | Original results                     | 1.3  | 0.4 | 0.6  | 1.7  |
| K4           | 10-20      | Original results                     | 2.3  | 0.9 | 1.5  | 4.7  |
| K4           | 20-30      | Original results                     | 1.5  | 0.5 | 1.0  | 3.3  |
| K4           | 30-40      | Original results                     | 1.5  | 0.7 | 1.1  | 3.4  |
| K4           | 40-50      | Original results                     | 1.9  | 1.2 | 1.5  | 4.6  |
| K4           | 50-60      | Original results                     | 2.4  | 1.4 | 1.9  | 6.1  |
| K4           | 60-70      | Original results                     | 2.8  | 1.5 | 2.0  | 6.9  |
| K4           | 70-80      | Original results                     | 1.7  | 1.0 | 1.4  | 4.3  |
| K4           | 80-90      | Original results                     | 2.0  | 1.0 | 1.4  | 4.5  |
| K4           | 90-100     | Original results                     | 1.5  | 0.8 | 1.1  | 3.4  |
| K4           | 0-50cm     | Original results                     | 8.5  | 3.6 | 5.9  | 17.7 |
| K4           | 0-10       | Homogeneous soil                     | 2.8  | 1.1 | 1.4  | 4.1  |
| K4           | 10-20      | Homogeneous soil                     | 1.9  | 0.9 | 1.4  | 4.3  |
| K4           | 20-30      | Homogeneous soil                     | 1.7  | 0.9 | 1.3  | 4.0  |
| K4           | 30-40      | Homogeneous soil                     | 1.7  | 0.8 | 1.2  | 4.0  |
| K4           | 40-50      | Homogeneous soil                     | 1.7  | 0.8 | 1.2  | 4.0  |
| K4           | 50-60      | Homogeneous soil                     | 1.7  | 0.9 | 1.3  | 4.0  |
| K4           | 60-70      | Homogeneous soil                     | 1.7  | 0.9 | 1.3  | 4.1  |
| K4           | 70-80      | Homogeneous soil                     | 1.9  | 0.9 | 1.4  | 4.2  |
| K4           | 80-90      | Homogeneous soil                     | 2.0  | 0.9 | 1.4  | 4.2  |
| K4           | 90-100     | Homogeneous soil                     | 2.0  | 0.9 | 1.4  | 4.3  |
| K4           | 0-50cm     | Homogeneous soil                     | 9.7  | 4.6 | 6.6  | 20.4 |
| K4           | 0-10       | Homogeneous Soil physical properties | 2.7  | 0.8 | 1.3  | 3.7  |
| K4           | 10-20      | Homogeneous Soil physical properties | 1.9  | 0.7 | 1.3  | 3.9  |
| K4           | 20-30      | Homogeneous Soil physical properties | 1.7  | 0.6 | 1.2  | 3.9  |
| K4           | 30-40      | Homogeneous Soil physical properties | 1.7  | 0.7 | 1.2  | 3.8  |
| K4           | 40-50      | Homogeneous Soil physical properties | 1.6  | 1.0 | 1.3  | 3.9  |
| K4           | 50-60      | Homogeneous Soil physical properties | 1.6  | 1.0 | 1.3  | 4.2  |
| K4           | 60-70      | Homogeneous Soil physical properties | 1.8  | 1.3 | 1.4  | 4.3  |
| K4           | 70-80      | Homogeneous Soil physical properties | 1.9  | 1.0 | 1.5  | 4.5  |
| K4           | 80-90      | Homogeneous Soil physical properties | 2.1  | 1.1 | 1.4  | 4.5  |
| K4           | 90-100     | Homogeneous Soil physical properties | 2.0  | 1.1 | 1.5  | 4.5  |
| K4           | 0-50cm     | Homogeneous Soil physical properties | 9.7  | 3.9 | 6.4  | 19.2 |
| K4           | 0-10       | Homogeneous mineralogy               | 1.3  | 0.5 | 0.7  | 1.9  |
| K4           | 10-20      | Homogeneous mineralogy               | 2.3  | 1.1 | 1.7  | 5.1  |
| K4           | 20-30      | Homogeneous mineralogy               | 1.5  | 0.7 | 1.1  | 3.7  |
| K4           | 30-40      | Homogeneous mineralogy               | 1.5  | 0.8 | 1.1  | 3.6  |
| K4           | 40-50      | Homogeneous mineralogy               | 2.0  | 1.0 | 1.5  | 4.7  |
| K4           | 50-60      | Homogeneous mineralogy               | 2.4  | 1.2 | 1.8  | 5.8  |
| K4           | 60-70      | Homogeneous mineralogy               | 2.8  | 1.4 | 2.1  | 6.6  |
| K4           | 70-80      | Homogeneous mineralogy               | 1.8  | 0.9 | 1.3  | 4.0  |
| K4           | 80-90      | Homogeneous mineralogy               | 1.9  | 0.9 | 1.4  | 4.2  |
| K4           | 90-100     | Homogeneous mineralogy               | 1.5  | 0.7 | 1.0  | 3.2  |
| K4           | 0-50cm     | Homogeneous mineralogy               | 8.5  | 4.1 | 6.0  | 18.7 |
| K1           | 0-10       | Original results                     | 1.4  | 0.6 | 0.7  | 2.0  |
| K1           | 10-20      | Original results                     | 1.2  | 0.5 | 0.9  | 2.7  |
| K1           | 20-30      | Original results                     | 1.5  | 0.7 | 1.0  | 3.4  |
| K1           | 30-40      | Original results                     | 1.4  | 0.7 | 1.1  | 3.1  |
| K1           | 40-50      | Original results                     | 2.5  | 1.2 | 1.7  | 5.6  |
| K1           | 50-60      | Original results                     | 2.9  | 1.5 | 2.0  | 6.6  |
| K1           | 60-70      | Original results                     | 4.2  | 2.1 | 3.0  | 10.1 |
| K1           | 70-80      | Original results                     | 5.2  | 2.9 | 3.8  | 12.4 |
| K1           | 80-90      | Original results                     | 8.0  | 4.3 | 5.3  | 19.9 |
| K1           | 90-100     | Original results                     | 5.2  | 2.9 | 3.7  | 13.3 |
| K1           | 0-50cm     | Original results                     | 8.1  | 3.7 | 5.4  | 16.8 |
| K1           | 0-10       | Homogeneous soil                     | 4.8  | 1.9 | 2.3  | 7.1  |
| K1           | 10-20      | Homogeneous soil                     | 2.9  | 1.4 | 2.1  | 6.6  |
| K1           | 20-30      | Homogeneous soil                     | 2.7  | 1.4 | 1.9  | 6.3  |
| K1           | 30-40      | Homogeneous soil                     | 2.6  | 1.3 | 1.8  | 6.1  |
| K1           | 40-50      | Homogeneous soil                     | 2.5  | 1.3 | 1.8  | 6.1  |
| K1           | 50-60      | Homogeneous soil                     | 2.5  | 1.3 | 1.8  | 6.1  |
| K1           | 60-70      | Homogeneous soil                     | 2.5  | 1.3 | 1.8  | 6.1  |
| K1           | 70-80      | Homogeneous soil                     | 2.6  | 1.4 | 1.8  | 6.2  |
| K1           | 80-90      | Homogeneous soil                     | 2.7  | 1.4 | 1.9  | 6.3  |
| K1           | 90-100     | Homogeneous soil                     | 2.7  | 1.4 | 1.9  | 6.4  |
| K1           | 0-50cm     | Homogeneous soil                     | 15.5 | 7.4 | 10.0 | 32.4 |
| K1           | 0-10       | Homogeneous Soil physical properties | 4.8  | 2.0 | 2.4  | 6.5  |
| K1           | 10-20      | Homogeneous Soil physical properties | 2.9  | 1.2 | 2.1  | 6.5  |
| K1           | 20-30      | Homogeneous Soil physical properties | 2.7  | 1.3 | 1.8  | 6.0  |
| K1           | 30-40      | Homogeneous Soil physical properties | 2.6  | 1.3 | 2.0  | 6.1  |
| K1           | 40-50      | Homogeneous Soil physical properties | 2.6  | 1.3 | 1.8  | 5.9  |
| K1           | 50-60      | Homogeneous Soil physical properties | 2.6  | 1.4 | 1.8  | 6.0  |
| K1           | 60-70      | Homogeneous Soil physical properties | 2.5  | 1.3 | 1.8  | 6.2  |
| K1           | 70-80      | Homogeneous Soil physical properties | 2.5  | 1.4 | 1.8  | 6.5  |
| K1           | 80-90      | Homogeneous Soil physical properties | 2.7  | 1.4 | 1.8  | 6.7  |
| K1           | 90-100     | Homogeneous Soil physical properties | 2.7  | 1.5 | 1.9  | 6.8  |
| K1           | 0-50cm     | Homogeneous Soil physical properties | 15.5 | 7.1 | 10.0 | 31.3 |
| K1           | 0-10       | Homogeneous mineralogy               | 1.4  | 0.6 | 0.7  | 2.1  |
| K1           | 10-20      | Homogeneous mineralogy               | 2.8  | 1.6 | 2.8  | 8.9  |
| K1           | 20-30      | Homogeneous mineralogy               | 1.5  | 0.8 | 1.1  | 3.5  |
| K1           | 30-40      | Homogeneous mineralogy               | 1.4  | 0.7 | 1.0  | 3.2  |
| K1           | 40-50      | Homogeneous mineralogy               | 2.5  | 1.2 | 1.7  | 5.8  |
| K1           | 50-60      | Homogeneous mineralogy               | 2.9  | 1.5 | 2.0  | 6.7  |
| K1           | 60-70      | Homogeneous mineralogy               | 4.2  | 2.2 | 3.0  | 10.0 |
| K1           | 70-80      | Homogeneous mineralogy               | 5.4  | 2.8 | 3.8  | 12.8 |
| K1           | 80-90      | Homogeneous mineralogy               | 7.8  | 4.1 | 5.5  | 18.9 |
| K1           | 90-100     | Homogeneous mineralogy               | 5.1  | 2.7 | 3.6  | 12.5 |
| K1           | 0-50cm     | Homogeneous mineralogy               | 8.1  | 3.9 | 5.4  | 17.4 |
| F4           | 0-10       | Original results                     | 1.8  | 0.6 | 0.8  | 2.7  |
| F4           | 10-20      | Original results                     | 1.1  | 0.4 | 0.8  | 2.2  |
| F4           | 20-30      | Original results                     | 2.1  | 0.8 | 1.5  | 5.1  |
| F4           | 30-40      | Original results                     | 2.9  | 1.4 | 2.0  | 7.1  |
| F4           | 40-50      | Original results                     | 2.0  | 1.0 | 1.5  | 5.0  |
| F4           | 50-60      | Original results                     | 2.1  | 1.0 | 1.5  | 5.2  |
| F4           | 60-70      | Original results                     | 2.1  | 1.1 | 1.5  | 5.2  |
| F4           | 70-80      | Original results                     | 2.3  | 1.2 | 1.6  | 5.1  |
| F4           | 80-90      | Original results                     | 2.4  | 1.4 | 1.8  | 5.9  |
| F4           | 90-100     | Original results                     | 2.1  | 1.0 | 1.6  | 5.4  |
| F4           | 0-50cm     | Original results                     | 9.8  | 4.2 | 6.7  | 21.6 |
| F4           | 0-10       | Homogeneous soil                     | 2.9  | 1.1 | 1.4  | 4.5  |
| F4           | 10-20      | Homogeneous soil                     | 2.1  | 1.0 | 1.5  | 4.9  |
| F4           | 20-30      | Homogeneous soil                     | 1.9  | 0.9 | 1.4  | 4.7  |
| F4           | 30-40      | Homogeneous soil                     | 1.8  | 0.9 | 1.3  | 4.6  |
| F4           | 40-50      | Homogeneous soil                     | 1.8  | 0.9 | 1.3  | 4.6  |
| F4           | 50-60      | Homogeneous soil                     | 1.9  | 0.9 | 1.4  | 4.6  |
| F4           | 60-70      | Homogeneous soil                     | 1.9  | 0.9 | 1.4  | 4.7  |
| F4           | 70-80      | Homogeneous soil                     | 2.0  | 1.0 | 1.5  | 4.8  |
| F4           | 80-90      | Homogeneous soil                     | 2.2  | 1.0 | 1.5  | 4.9  |
| F4           | 90-100     | Homogeneous soil                     | 2.1  | 1.0 | 1.5  | 4.9  |
| F4           | 0-50cm     | Homogeneous soil                     | 10.6 | 4.8 | 7.1  | 23.2 |
| F4           | 0-10       | Homogeneous Soil physical properties | 2.6  | 0.8 | 1.4  | 4.0  |
| F4           | 10-20      | Homogeneous Soil physical properties | 2.1  | 0.6 | 1.6  | 4.6  |
| F4           | 20-30      | Homogeneous Soil physical properties | 1.8  | 0.8 | 1.4  | 4.6  |
| F4           | 30-40      | Homogeneous Soil physical properties | 1.9  | 0.9 | 1.3  | 4.7  |
| F4           | 40-50      | Homogeneous Soil physical properties | 1.9  | 0.9 | 1.4  | 4.7  |
| F4           | 50-60      | Homogeneous Soil physical properties | 1.9  | 0.9 | 1.4  | 4.8  |
| F4           | 60-70      | Homogeneous Soil physical properties | 1.9  | 1.0 | 1.3  | 4.7  |
| F4           | 70-80      | Homogeneous Soil physical properties | 2.2  | 1.1 | 1.5  | 4.8  |
| F4           | 80-90      | Homogeneous Soil physical properties | 2.2  | 1.2 | 1.6  | 5.0  |
| F4           | 90-100     | Homogeneous Soil physical properties | 2.0  | 0.9 | 1.5  | 5.3  |
| F4           | 0-50cm     | Homogeneous Soil physical properties | 10.4 | 4.3 | 7.0  | 22.5 |
| F4           | 0-10       | Homogeneous mineralogy               | 2.0  | 0.8 | 1.0  | 3.1  |
| F4           | 10-20      | Homogeneous mineralogy               | 1.1  | 0.5 | 0.8  | 2.8  |
| F4           | 20-30      | Homogeneous mineralogy               | 2.1  | 1.0 | 1.6  | 5.2  |
| F4           | 30-40      | Homogeneous mineralogy               | 2.8  | 1.4 | 2.0  | 6.9  |
| F4           | 40-50      | Homogeneous mineralogy               | 1.9  | 0.9 | 1.4  | 4.8  |
| F4           | 50-60      | Homogeneous mineralogy               | 2.0  | 1.0 | 1.5  | 5.1  |
| F4           | 60-70      | Homogeneous mineralogy               | 2.1  | 1.0 | 1.5  | 5.2  |
| F4           | 70-80      | Homogeneous mineralogy               | 2.2  | 1.0 | 1.6  | 5.2  |
| F4           | 80-90      | Homogeneous mineralogy               | 2.4  | 1.1 | 1.7  | 5.6  |
| F4           | 90-100     | Homogeneous mineralogy               | 2.2  | 1.0 | 1.5  | 5.1  |
| F4           | 0-50cm     | Homogeneous mineralogy               | 9.9  | 4.6 | 6.8  | 22.4 |
| F3           | 0-10       | Original results                     | 3.1  | 0.9 | 1.4  | 4.3  |
| F3           | 10-20      | Original results                     | 1.7  | 0.7 | 1.1  | 3.6  |
| F3           | 20-30      | Original results                     | 1.3  | 0.6 | 0.9  | 3.0  |
| F3           | 30-40      | Original results                     | 1.3  | 0.7 | 0.9  | 3.0  |
| F3           | 40-50      | Original results                     | 1.6  | 0.8 | 1.2  | 3.6  |
| F3           | 50-60      | Original results                     | 0.7  | 0.3 | 0.4  | 1.3  |
| F3           | 60-70      | Original results                     | 0.7  | 0.3 | 0.3  | 1.2  |
| F3           | 70-80      | Original results                     | 1.2  | 1.1 | 0.9  | 2.3  |
| F3           | 80-90      | Original results                     | 9.1  | 3.7 | 5.4  | 17.5 |
| F3           | 90-100     | Original results                     | 2.0  | 0.9 | 2.9  | 6.9  |
| F3           | 0-10       | Homogeneous soil                     | 1.5  | 0.7 | 1.0  | 3.2  |
| F3           | 10-20      | Homogeneous soil                     | 1.3  | 0.7 | 0.9  | 3.0  |
| F3           | 20-30      | Homogeneous soil                     | 1.3  | 0.7 | 0.9  | 3.0  |
| F3           | 30-40      | Homogeneous soil                     | 1.3  | 0.7 | 0.9  | 3.0  |
| F3           | 40-50      | Homogeneous soil                     | 1.4  | 0.7 | 0.9  | 3.8  |
| F3           | 50-60      | Homogeneous soil                     | 1.5  | 0.7 | 0.8  | 2.6  |
| F3           | 60-70      | Homogeneous soil                     | 1.5  | 0.7 | 0.7  | 2.5  |
| F3           | 70-80      | Homogeneous soil                     | 1.3  | 0.6 | 0.7  | 2.3  |
| F3           | 80-90      | Homogeneous soil                     | 2.5  | 3.7 | 4.7  | 15.0 |
| F3           | 90-100     | Homogeneous soil                     | 2.0  | 0.6 | 0.9  | 2.8  |
| F3           | 0-10       | Homogeneous Soil physical properties | 1.5  | 0.5 | 1.0  | 3.2  |
| F3           | 10-20      | Homogeneous Soil physical properties | 1.4  | 0.6 | 0.9  | 3.1  |
| F3           | 20-30      | Homogeneous Soil physical properties | 1.4  | 0.7 | 1.0  | 3.1  |
| F3           | 30-40      | Homogeneous Soil physical properties | 1.3  | 0.7 | 0.9  | 2.8  |
| F3           | 40-50      | Homogeneous Soil physical properties | 1.3  | 0.7 | 0.8  | 2.8  |
| F3           | 50-60      | Homogeneous Soil physical properties | 1.5  | 0.7 | 0.8  | 2.6  |
| F3           | 60-70      | Homogeneous Soil physical properties | 1.6  | 0.7 | 0.7  | 2.6  |
| F3           | 70-80      | Homogeneous Soil physical properties | 1.1  | 1.0 | 2.1  | 2.1  |
| F3           | 80-90      | Homogeneous Soil physical properties | 7.6  | 3.2 | 4.6  | 15.0 |
| F3           | 90-100     | Homogeneous Soil physical properties | 3.1  | 1.3 | 1.5  | 4.5  |
| F3           | 0-10       | Homogeneous mineralogy               | 1.7  | 0.8 | 1.2  | 3.6  |
| F3           | 10-20      | Homogeneous mineralogy               | 1.3  | 0.7 | 0.9  | 2.9  |
| F3           | 20-30      | Homogeneous mineralogy               | 1.3  | 0.7 | 0.9  | 2.9  |
| F3           | 30-40      | Homogeneous mineralogy               | 1.3  | 0.7 | 0.9  | 2.9  |
| F3           | 40-50      | Homogeneous mineralogy               | 1.7  | 0.9 | 1.1  | 3.6  |
| F3           | 50-60      | Homogeneous mineralogy               | 0.7  | 0.4 | 0.4  | 1.3  |
| F3           | 60-70      | Homogeneous mineralogy               | 0.7  | 0.4 | 0.3  | 1.1  |
| F3           | 70-80      | Homogeneous mineralogy               | 1.4  | 0.7 | 0.8  | 2.5  |
| F3           | 80-90      | Homogeneous mineralogy               | 9.0  | 4.4 | 5.6  | 17.6 |
| F3           | 90-100     | Homogeneous mineralogy               | 2.0  | 0.6 | 0.9  | 2.8  |
